# Supplementary material
Source: MDPI journal article supplement (https://www.mdpi.com/2543-6031/92/2/18)
Supplement: s1 [file s1]

## Supplementary Materials

**Table S1.** Search strategy for PubMed.

| No.                       | Concept, domain                                              | Search term, query                                                                                                                                                                                                                                                                                                                                                                                                                                                                                                                                                                                                                                                                                                                                                                                                                                                   |
|---------------------------|--------------------------------------------------------------|----------------------------------------------------------------------------------------------------------------------------------------------------------------------------------------------------------------------------------------------------------------------------------------------------------------------------------------------------------------------------------------------------------------------------------------------------------------------------------------------------------------------------------------------------------------------------------------------------------------------------------------------------------------------------------------------------------------------------------------------------------------------------------------------------------------------------------------------------------------------|
| 1                         | Search terms for:<br>spirometry<br>(title/abstract/keywords) | spirometry[tiab] OR spirometer[tiab] OR spirometer[tiab] OR spirometers[tiab] OR spirometries[tiab] OR "pulmonary function test"[tiab] OR "pulmonary function tests"[tiab]                                                                                                                                                                                                                                                                                                                                                                                                                                                                                                                                                                                                                                                                                           |
| 2                         | MeSH terms for:<br>spirometry                                | "Spirometry"[Mesh]                                                                                                                                                                                                                                                                                                                                                                                                                                                                                                                                                                                                                                                                                                                                                                                                                                                   |
| 3                         | Search terms for:<br>screening<br>(title/abstract/keywords)  | screening[tiab] OR screenings[tiab] OR "case finding"[tiab] OR prevalence[tiab] OR "early detection"[tiab] OR "early identification"[tiab] OR diagnosis[tiab] OR diagnoses[tiab]                                                                                                                                                                                                                                                                                                                                                                                                                                                                                                                                                                                                                                                                                     |
| 4                         | MeSH terms for:<br>screening                                 | "Mass Screening"[Mesh] OR "Diagnosis"[Mesh:NoExp] OR "Early Diagnosis"[Mesh:NoExp]                                                                                                                                                                                                                                                                                                                                                                                                                                                                                                                                                                                                                                                                                                                                                                                   |
| 5                         | Search terms for:<br>COPD<br>(title/abstract/keywords)       | COPD[tiab] OR "obstructive pulmonary disease"[tiab] OR "obstructive pulmonary diseases"[tiab] OR "obstructive lung disease"[tiab] OR "obstructive lung diseases"[tiab] OR "airway obstruction"[tiab] OR "airways obstruction"[tiab] OR "airway obstructions"[tiab] OR "airways obstructions"[tiab] OR "obstructive airway disease"[tiab] OR "obstructive airway diseases"[tiab] OR "airflow obstruction"[tiab] OR "airflow obstructions"[tiab] OR "pulmonary emphysema"[tiab] OR "pulmonary emphysemas"[tiab] OR "focal emphysema"[tiab] OR "focal emphysemas"[tiab] OR "panacinar emphysema"[tiab] OR "panacinar emphysemas"[tiab] OR "panlobular emphysema"[tiab] OR "panlobular emphysemas"[tiab] OR "centriacinar emphysema"[tiab] OR "centriacinar emphysemas"[tiab] OR "centrilobular emphysema"[tiab] OR "centrilobular emphysemas"[tiab] OR bronchitis[tiab] |
| 6                         | MeSH terms for:<br>COPD                                      | "Pulmonary Disease, Chronic Obstructive"[Mesh:NoExp] OR "Pulmonary Emphysema"[Mesh] OR "Bronchitis, Chronic"[Mesh]                                                                                                                                                                                                                                                                                                                                                                                                                                                                                                                                                                                                                                                                                                                                                   |
| 7                         | Combined search blocks                                       | (#1 OR #2) AND (#3 OR #4) AND (#5 OR #6)                                                                                                                                                                                                                                                                                                                                                                                                                                                                                                                                                                                                                                                                                                                                                                                                                             |
| 8                         | Search filter                                                | NOT (review[pt] OR "systematic review"[pt] OR "case reports"[pt] OR "editorial"[pt] OR "letter"[pt] OR "comment"[pt]) NOT ("animals"[mesh] NOT "humans"[mesh])                                                                                                                                                                                                                                                                                                                                                                                                                                                                                                                                                                                                                                                                                                       |
| Total search, items found |                                                              | 7 AND 8, N= 3954                                                                                                                                                                                                                                                                                                                                                                                                                                                                                                                                                                                                                                                                                                                                                                                                                                                     |

**Table S2.** JBI assessment results of studies.

[illegible]

**Table S3.** Publications addressing the diagnostic screening of COPD along with the characterization of patient inclusion criteria.

|    | First author, year of publication | Type of spirometer      | Inclusion criteria: age; PY | Inclusion criteria (symptoms)                                  | The diagnostic questionnaire used           | % newly diagnosed COPD |
|----|-----------------------------------|-------------------------|-----------------------------|----------------------------------------------------------------|---------------------------------------------|------------------------|
| 1  | Kotz, 2008 [25]                   | Portable                | 40–70; ≥ 10                 | at least one respiratory symptom                               | CDQ                                         | 41.1                   |
| 2  | Represas-Represas, 2016 [30]      | Portable                | > 40; ≥ 10                  | ‘symptoms suggestive of COPD’                                  | N/A                                         | 31.5                   |
| 3  | Al Lami, 2017 [31]                | Portable                | > 35; > 20                  | LFQ ≤ 18                                                       | LFQ                                         | 16.7                   |
| 4  | Tran, 2020 [34]                   | Portable                | > 40; > 10                  | ‘symptoms suggestive of COPD’<br>productive cough for at least | CAT; mMRC                                   | 27.2                   |
| 5  | Yawn, 2009 [37]                   | Conventional            | > 40; ≥ 10                  | 3 consecutive months in each of 2 successive years             | MRC; modified ATS respiratory questionnaire | 26                     |
| 6  | Lee, 2015 [39]                    | Conventional            | ≥ 75; ≥ 20                  | patients positive on the CTS screen to at least one question   | COPD Screening Questions by CTS             | 36.4                   |
| 7  | Sansores, 2015 [40]               | Conventional            | > 40; ≥ 10                  | at least one respiratory symptom                               | ‘questionnaire containing 28 items’         | 11.4                   |
| 8  | Su, 2019 [42]                     | Conventional            | ≥ 40; ≥ 20                  | ‘subjects with respiratory symptoms’                           | CAT                                         | 47.9                   |
| 9  | Tran, 2020 [34]                   | Conventional            | > 40; > 10                  | ‘symptoms suggestive of COPD’                                  | CAT; mMRC                                   | 27.2                   |
| 10 | Hwang, 2021 [43]                  | Conventional            | > 40; > 10                  | ‘subjects with respiratory symptoms’                           | mMRC                                        | 47.9                   |
| 11 | Kim, 2016 [47]                    | COPD-6 + conventional   | > 40; > 10                  | ‘subjects with respiratory symptoms’                           | The “Could it be COPD?” questionnaire       | 23.7                   |
| 12 | Lin, 2021 [50]                    | Portable + conventional | ≥ 40; ≥ 10                  | at least one respiratory symptom                               | CAT                                         | 27.8                   |

CAT: the COPD Assessment Test; CTS: Canadian Thoracic Society; CDQ: the COPD Diagnostic Questionnaire; LFQ: the Lung Function Questionnaire, MRC: the Medical Research Council Dyspnea Scale; mMRC: the Modified Medical Research Council Dyspnea Scale; ND: no data applicable;
